# Supplementary material for: Isolation and characterization of Plant growth-promoting hormones by an endophytic bacterium, Curtobacterium. citreum AVN2 isolated from the rhizome of Curcuma longa L
Source: Research Square preprint supplement (doi:10.21203/rs.3.rs-7602699/v1), 2025-09-29

Figure: Qualitative screening of PGP (Plant Growth-Promoting) traits


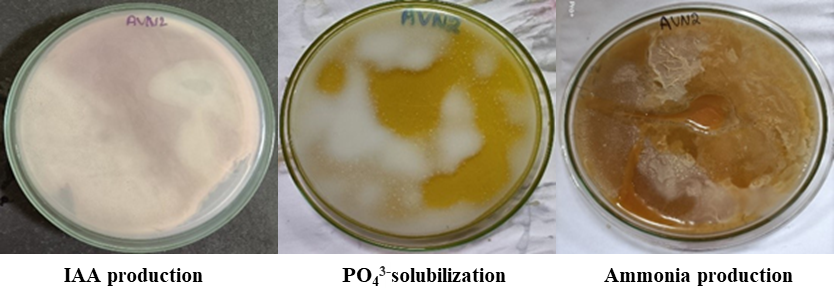


Figure: Antifungal activity of AVN2 against *Fusarium oxysporum*. Sp. *Lycopersici* in dual culture assay


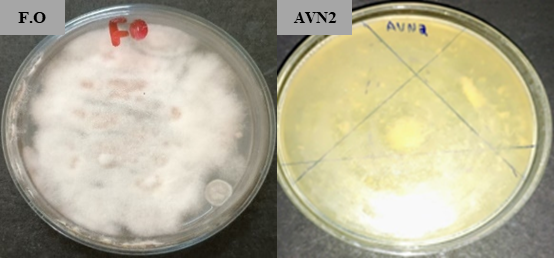


After 14 days, C. citreum AVN2 showed high growth inhibition on *Fusarium. oxysporum sp.* *Lycopersici,* confirming its antifungal activity.

The radius of pathogenic fungi alone in the control plate = 68 mm

The radius of pathogenic fungi along with *C. citreum* in a dual culture plate = 6mm

**Radial growth inhibition**

Control plate- Dual culture plate = 68-6 =62 mm

% of growth inhibition of *C. citreum* = (Radial growth inhibition/ radial growth of fungi without *C. citreum*) X 100

% of growth inhibition of *C. citreum* = 62/68X100= 91.1%

Table Radial growth inhibition of *Fusarium. oxysporum sp.* *Lycopersici* by endophytic *C. citreum*

|  | Radius (mm) | Radial growth inhibition | % of growth inhibition of *C. citreum* |
| --- | --- | --- | --- |
| Radius of Pathogenic fungi alone in control plate | 68 mm | Control plate- Dual culture plate = 68-6 =62 mm | % of growth inhibition of *C. citreum*  62/68X100= 91.1% |
| Radius of pathogenic fungi along with C, citreum AVN2 | 6 mm |

Fig Structure of Bioactive compounds produced by *C. citreum* AVN2


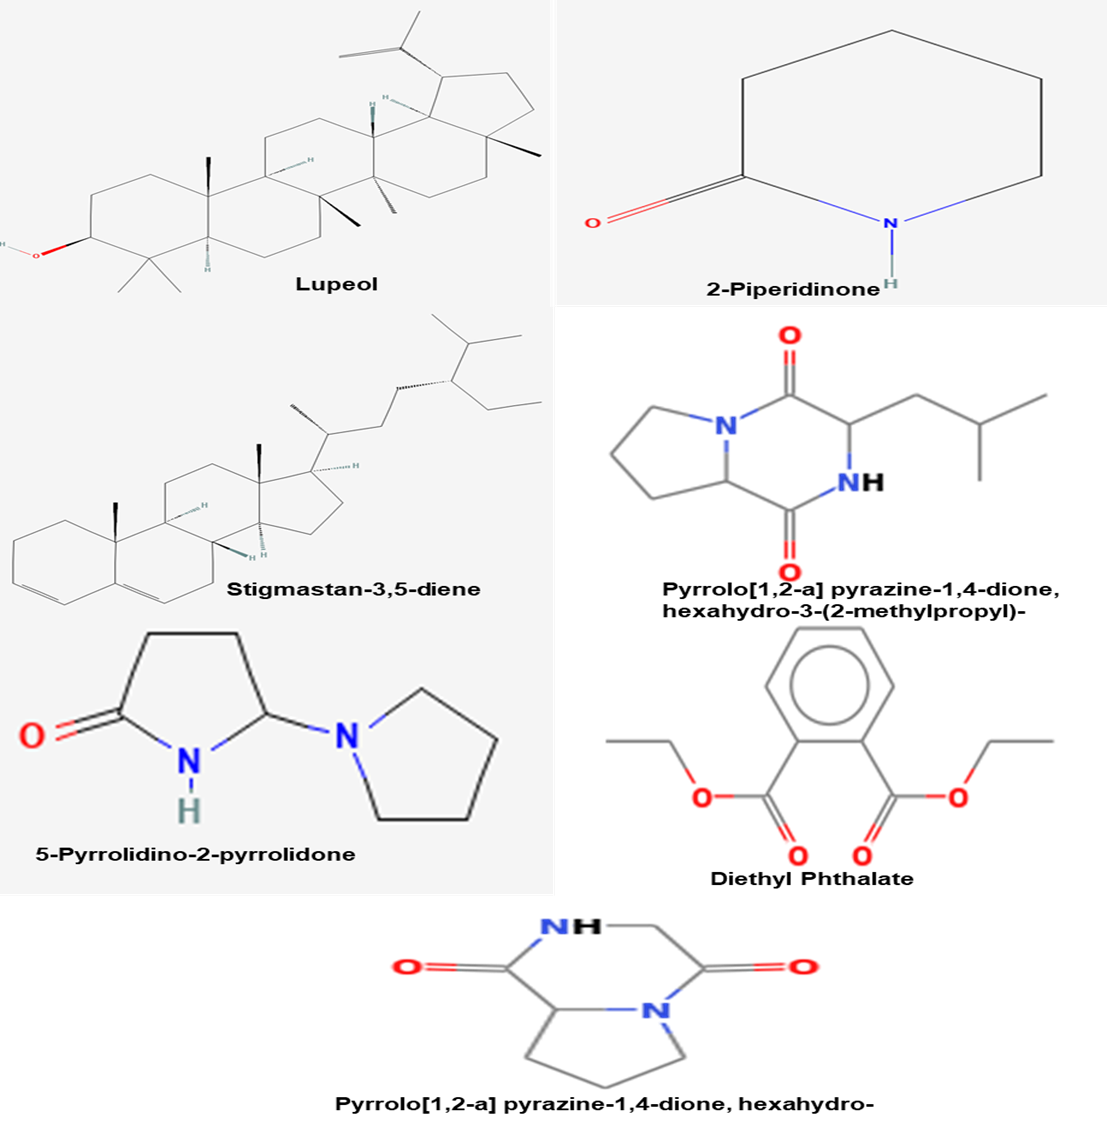

Supplement: Supplementary file 1 [file b61e1de492bc4924c6f5a9eb.docx]
